# Supplementary material
Source: PubMed Central journal article supplement (PMC2563063)
Supplement: 0808028105_0808028105SI.pdf [file 0808028105_0808028105SI.pdf]

# Supporting Information

Pan *et al.* 10.1073/pnas.0808028105

## SI Methods

**DNA Purification and DNA Quantitation: UV Spectrometer, PicoGreen Assay, and Agarose Gel.** The gDNA was made with DNeasy Blood and Tissue Kit (Qiagen). The purification of the amplicon was performed with QIAEXII (Qiagen), with its protocol option for purification of >4-kb products but with an additional wash and elution step. The two elutes were pooled. The original gDNA and purified amplicons were quantified by UV absorbance with a NanoDrop ND-1000 (NanoDrop Technologies) with the parameter set as  $\times 50$  for dsDNA, and/or measured by PicoGreen assay (Molecular Probes). The prepurified amplicons were usually preliminarily analyzed on ethidium bromide-stained agarose gels (1%). The band intensity was quantified with a Fluor-S MultiImager (Bio-Rad) when desired. When the prepurified products were measured with the PicoGreen assay, an N9 control with a complete reaction mixture except for phi29 DNA polymerase was applied in parallel, which value was subtracted from the read of the amplicons. The assay was performed on the MyiQ qPCR system (Bio-Rad) with the fluorophore set as SYBR Green, which shares the same range of excitation and emission wave as PicoGreen. The end-point reading was determined at 25°C. Alternatively, an end-point reading at 60°C was performed for the PicoGreen assay. With an end-reading at 60°C, the free excess oligonucleotides in the reaction system did not disturb the measurement of the true amplification product.

**Preparation of Intact Cells for Amplification.** White blood cells (WBC) were separated with Ficoll lymphocyte separation medium (Mediatech) and sorted by FACS (Cell Sorter Facility, Yale University School of Medicine) to remove red cells. The nucleated cells were collected and serially diluted with PBS, and 20 aliquots, each consisting of 1  $\mu$ l of the cell suspension from the same tube, were counted separately on a hemacytometer under a microscope: The cell number per microliter ranged from 0 to 7.0 cells, with an average of  $2.8 \pm 1.9$  cells ( $\pm$ SD). The cells were distributed into thin-walled PCR tubes, each at 1  $\mu$ l, and stored at  $-80^\circ\text{C}$ . When amplifying the gDNA from the cells, the tubes were taken from  $-80^\circ\text{C}$  and placed on ice for 3 min before the amplification procedure started.

**An Assay for Locus-Bias Assessment: The Locus-Bias Score (LBS).** The  $\Delta\Delta\text{Ct}$  method is commonly used to quantify the copy number difference of the inputs for qPCR (1). Accordingly, it is reasonable to apply the  $\Delta\text{Ct}$  (the threshold cycle number difference of test vs. reference DNA) to represent the copy number (or fold) difference when an identical amount of tested samples and reference DNA control were used as input for parallel qPCR. However, the variation of repetitive tests of one single locus cannot reflect the variation in representation between loci. Therefore, we chose eight loci along the genome as a panel to validate the locus bias of amplified samples. The standard deviation of this panel of locus-based  $\Delta\text{Ct}$  was termed “locus-bias score” (LB score, or LBS).

Based on tests with a series of primer sets, ordered from Integrated DNA Technologies (IDT), for loci on different chromosomes (from ref. 2), eight loci from different chromosomes (2p, 3p, 4p, 5p, 7p, 10p, 13p, and 19p, from WIAF Whitehead Institute SNP database: 1004, 114, 1958, 1331, 349,

966, 474, and 893) (2) were chosen to construct a panel for locus-bias measurements. These loci were selected to represent regions with very different levels of amplification by standard MDA. The amplification products with these primers showed a single sharp on agarose gel, a single peak in the melting curve, and an amplification efficiency (the primer slope) ranging from 1.8 to 2.0.

$\Delta\text{Ct}(n)$  for each locus ( $n = 1, 2, \dots, 8$ ) was defined as

$$\Delta\text{Ct}_n = \text{Ct}(x_n) - \text{Ct}(r_n), \quad [\text{S1}]$$

where  $\text{Ct}(x_n)$  denotes the Ct of the tested sample “x” in the locus  $n$ ;  $\text{Ct}(r_n)$  denotes the Ct of the reference sample “r” in the locus  $n$ .

For a given sample, the average  $\Delta\text{Ct}$  and the standard deviation for the panel of loci (8-loci) were recorded as “ $\text{Av}\Delta\text{Ct}$ ” and “ $\text{Sd}\Delta\text{Ct}$ ”

$$\begin{aligned} \text{Av}\Delta\text{Ct} &= [\Delta\text{Ct}(1) + \Delta\text{Ct}(2) + \dots + \Delta\text{Ct}(8)]/8 \\ &= [\sum\Delta\text{Ct}(n)]/8, n = 1-8 \end{aligned}$$

$$\text{LBS} = \text{Sd}[\Delta\text{Ct}(n)], n = 1-8. \quad [\text{S2}]$$

The standard deviation of LBS ( $\text{Sd\_LBS}$ ) was calculated from amplification and qPCR repeated experiment (Table S3). In addition, we observed that different loci varied slightly in Ct value in different repetitions, even for the original reference gDNA. Therefore, some variations were solely due to the nature of qPCR. Assuming that the qPCR variability is independent of the locus variability, the qPCR variation was subtracted from the total variability measured with the samples when we estimated the net amplification variation between loci:

$$\text{Net\_LBS} = (\text{LBS}_x^2 - \text{LBS}_r^2)^{1/2} \quad [\text{S3}]$$

Here,  $\text{LBS}_x$  denotes LBS for test sample x, and  $\text{LBS}_r$  denotes LBS for reference control “r.”  $\text{LBS}_r$  was the average of 9 samples of genomic DNA that were measured as tests, against another randomly chosen sample of genomic DNA that was taken as their reference.

When the total input of gDNA for qPCR was varied from 50 to 2.5 ng, the LBS in our tests essentially did not exhibit significant variation, although the  $\text{Av}\Delta\text{Ct}$  did increase proportionally (data not shown). Thus, LBS could be regarded as a reliable indicator for locus bias, which remains consistent even if the amount of input DNA for qPCR changes within a wide range.

LBS qPCR was performed on a MyiQ cycler, using iQ SYBR Green SuperMix (Bio-Rad). For each locus, a qPCR master mix including specific primers was prepared, and aliquots of 20  $\mu$ l were distributed to each well. A 5- $\mu$ l aliquot of purified amplicon or native gDNA was added as template, respectively, with their concentration pre-adjusted in water to 2 ng/ $\mu$ l. Therefore, for all samples, an identical 10 ng DNA was input for one qPCR reaction. The final reaction volume was 25  $\mu$ l. The PCR program was as follows: 3 min at  $94^\circ\text{C}$  for 1 cycle; 10 s at  $94^\circ\text{C}$ , 30 s at  $60^\circ\text{C}$ , and 30 s at  $72^\circ\text{C}$  for 45 cycles; followed by the standard melt curve analysis program.

1. Pfaffl MW (2001) A new mathematical model for relative quantification in real-time RT-PCR. *Nucleic Acids Res* 29:e45.

2. Hosono S, *et al.* (2003) Unbiased whole-genome amplification directly from clinical samples. *Genome Res* 13:954–964.

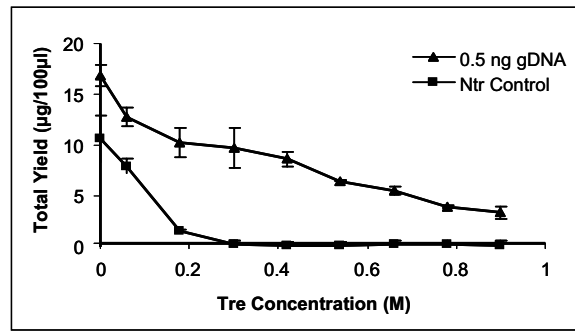

**Fig. S1.** Products of amplification with 0.5 ng of gDNA vs. Ntr control in the presence of Tre at various concentrations, measured by the intensity on an ethidium bromide-stained agarose gel (duplicate agarose gels and measurements). Each 5 (or 10)  $\mu\text{l}$  of amplicon from a 100- $\mu\text{l}$  total reaction was loaded on the ethidium bromide-containing agarose gel side-by-side, with a serially diluted 1-kb DNA ladder marker loaded as control. The photos were taken at different times of electrophoresis. The band intensity was quantified with the Fluor-S Multimager and Quantity One 4.5.2 software (Bio-Rad). The result demonstrated that the Ntr at 0.2 M Tre produced some positive TIP, showing a slight difference from Fig. 1C (PicoGreen assay), and that at 0.7–0.9 M Tre, the specific product was higher than that detected by PicoGreen. Because PicoGreen assay detects only dsDNA, and the early report that the ssDNA products increased with the reduction of starting DNA input [Bergen AW, Qi Y, Haque KA, Welch RA, Chanock SJ (2005) *BMC Biotechnol* 5:24], we proposed that this difference was due to the fact that, under these circumstances (Ntr at low Tre, specific DNA input at high Tre, or low input of DNA), ssDNA product may represent a significant portion of the product. However, we confirmed that NTR was indeed completely avoided in our optimized amplification system by using the initial amplicons from the control tubes with Tre at  $>0.54$  M as input for a second round of amplification. Even after two rounds of amplification, no product was detected. However, the demonstrated yields with low Tre (e.g., 0, 0.06, 0.18 M Tre) were a little less than the result measured with PicoGreen assay. This may be an underestimation because the DNA signal in agarose gel was saturated when the amount of DNA exceeded certain limitation, captured by the Fluor-S Multimager.

A

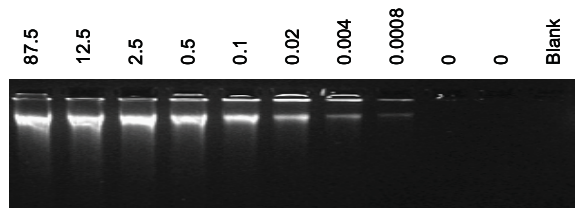

B

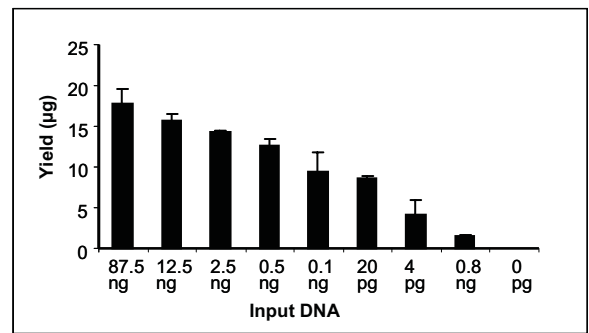

C

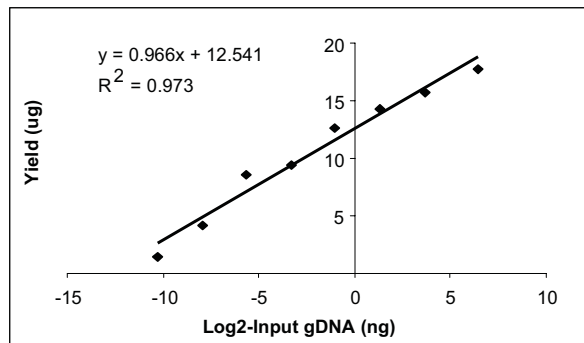

D

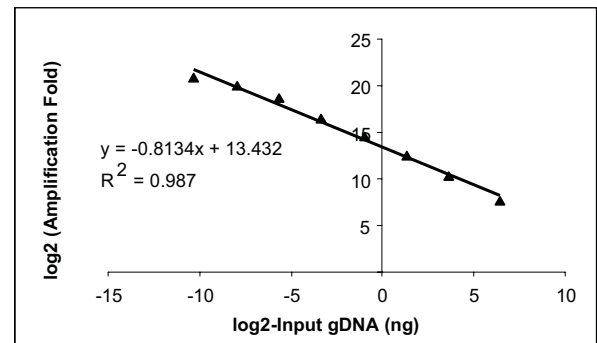

**Fig. S2.** The yield of products of reactions stopped at 16 h was input DNA-dependent. The amplification reaction was at 0.75 M Tre (Tre preparation lot T913) and followed the general amplification procedure. (A) Agarose gel showing the amplicon products for various inputs of gDNA (ng), all loaded with the same volume of nonpurified products (10 µl). Blank, well control without loading. (B) The yield was increased by increasing gDNA input, measured by PicoGreen assay (two times). (C) The yield was increased with the gDNA input increasing. (D) The amplification fold was increased with the reduction of the gDNA input.

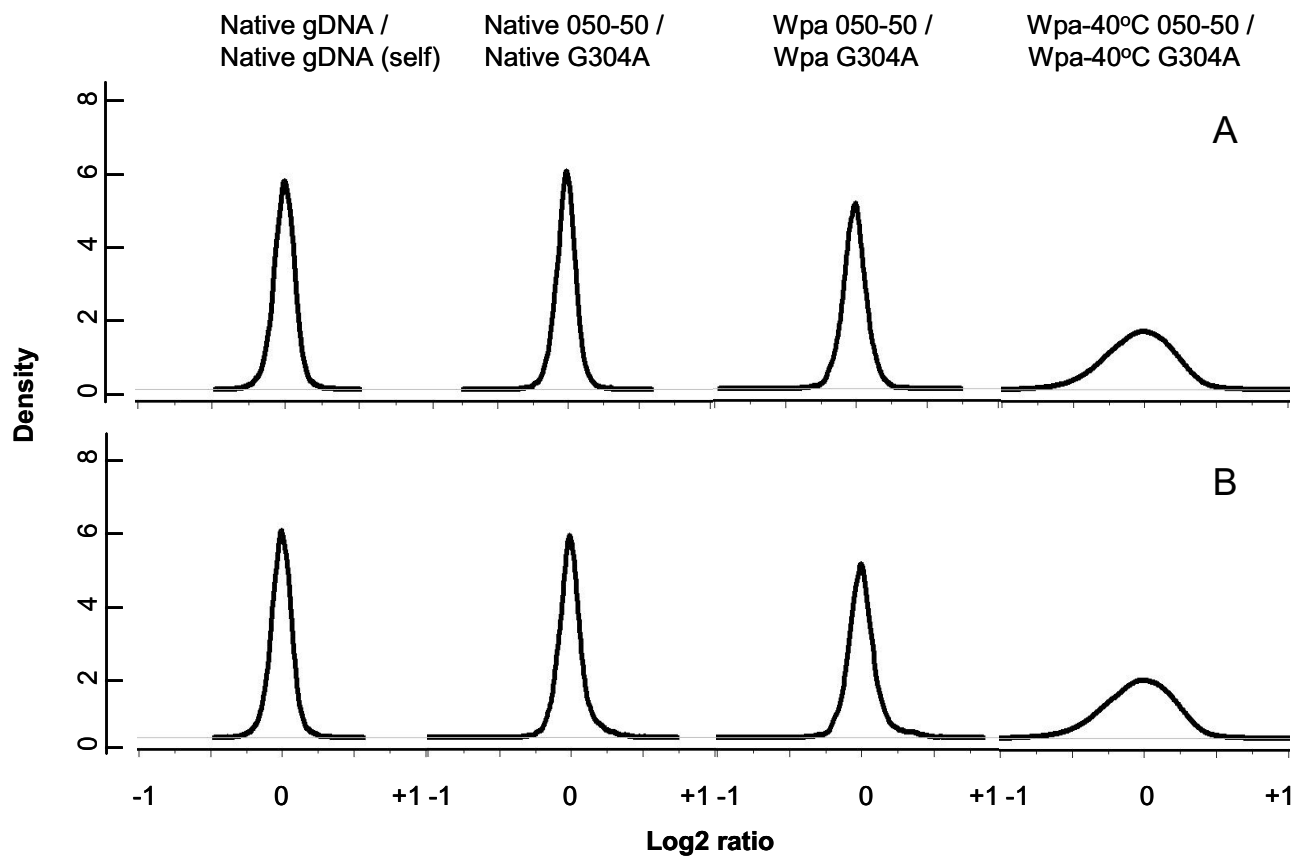

**Fig. S3.** Density distribution of log<sub>2</sub> ratio for variant sample pairs on tiling array for chromosome 22 long arm with a 2,000-bp sliding window. With normalization applied by NimbleScan 2.3, the average log<sub>2</sub> ratio is close to 0. The density graphs show the variability of log<sub>2</sub> ratio of each data set of fluorescent intensities as marked on the top. (A) The previously known or predicted CNV regions were excluded from all data to eliminate the possible effect of CNVs on the deviation. (B) All probes were included.

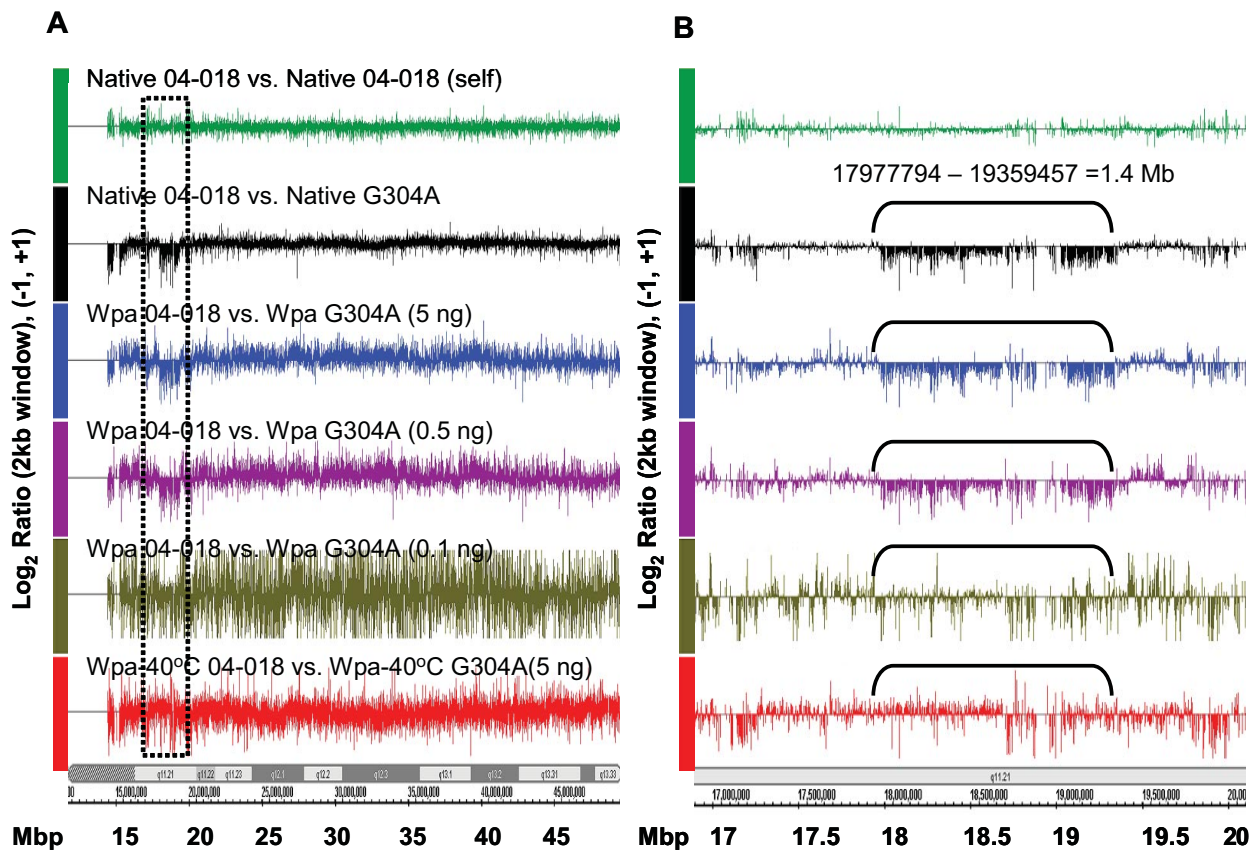

**Fig. S4.** Amplicon hybridization on a chromosome 22 tiling array reproduced the known segment copy number variation seen with native DNA (sample 04-018), showing known/confirmed heterozygous deletions with different amplification methods and different starting inputs (5, 0.5, and 0.1 ng) for the amplifications. The data processing and the method of labeling in this figure are the same as in Fig. 4. The sample 04-018 was slightly degraded. The "Native gDNA vs. Native gDNA self" (green) is an unamplified gDNA (04-018) against itself. All other Cy5/Cy3 sets are the amplified tested sample (04-018) vs. the amplified normal DNA control (G304A). The labels at the bottom are the chromosome 22 coordinates. (A) Through the whole chromosome 22 long arm at a 2-kb sliding window. The dot rectangle is the segment enlarged in B. (B) Expansion of a segment with a known heterozygous duplication (1.4 Mb) and analyzed with a 2-kb sliding window. (C) Expansion of a confirmed 18.2-kb heterozygous deletion (half brackets) with a 400-bp sliding window. This deletion was confirmed independently ahead of this research. (D) Expansion of a confirmed 975-bp homologous deletion (filled arrows) with a 400-bp sliding window.

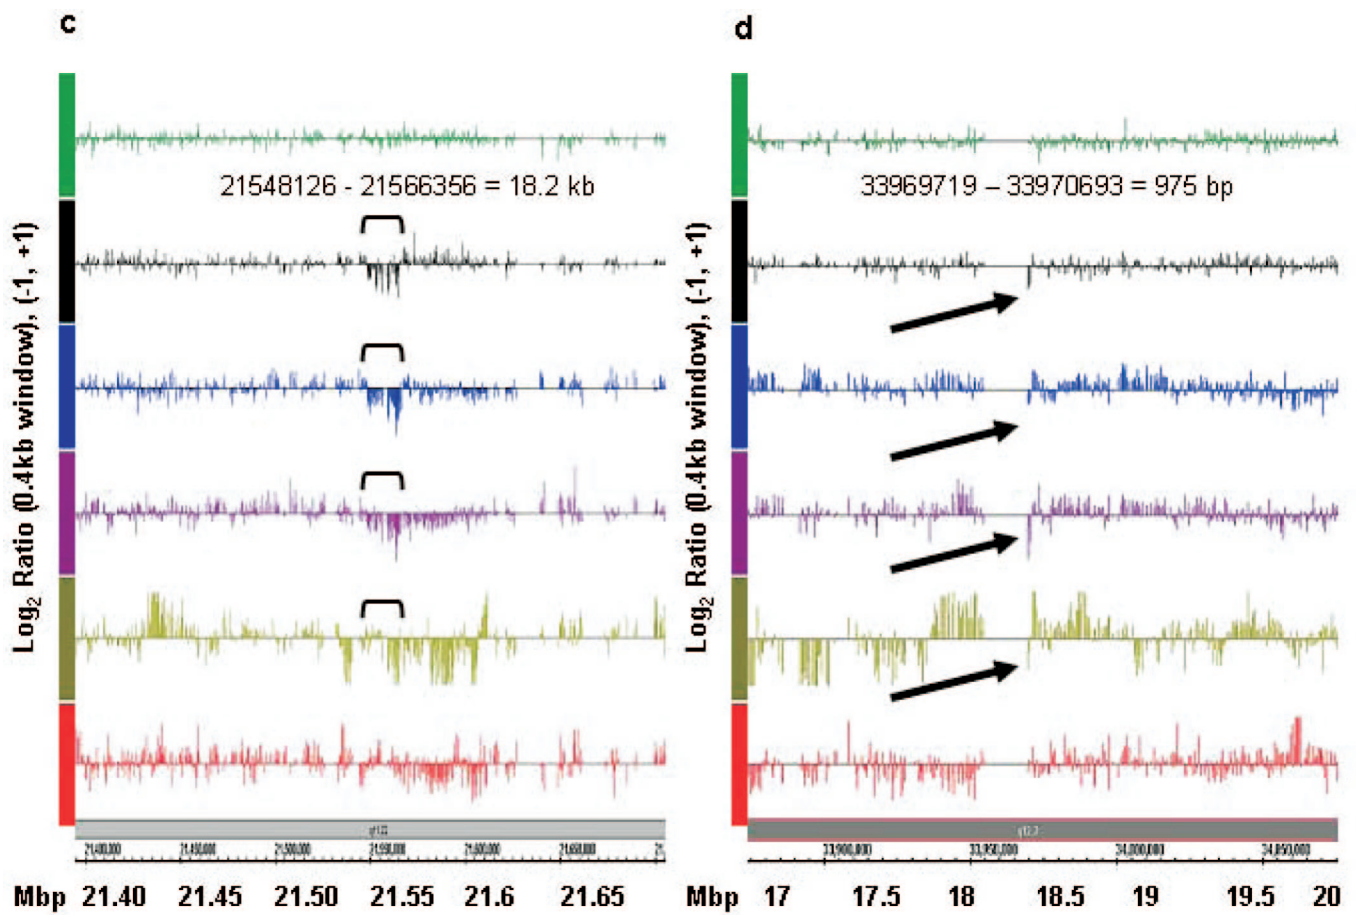

Fig. S4. Continued

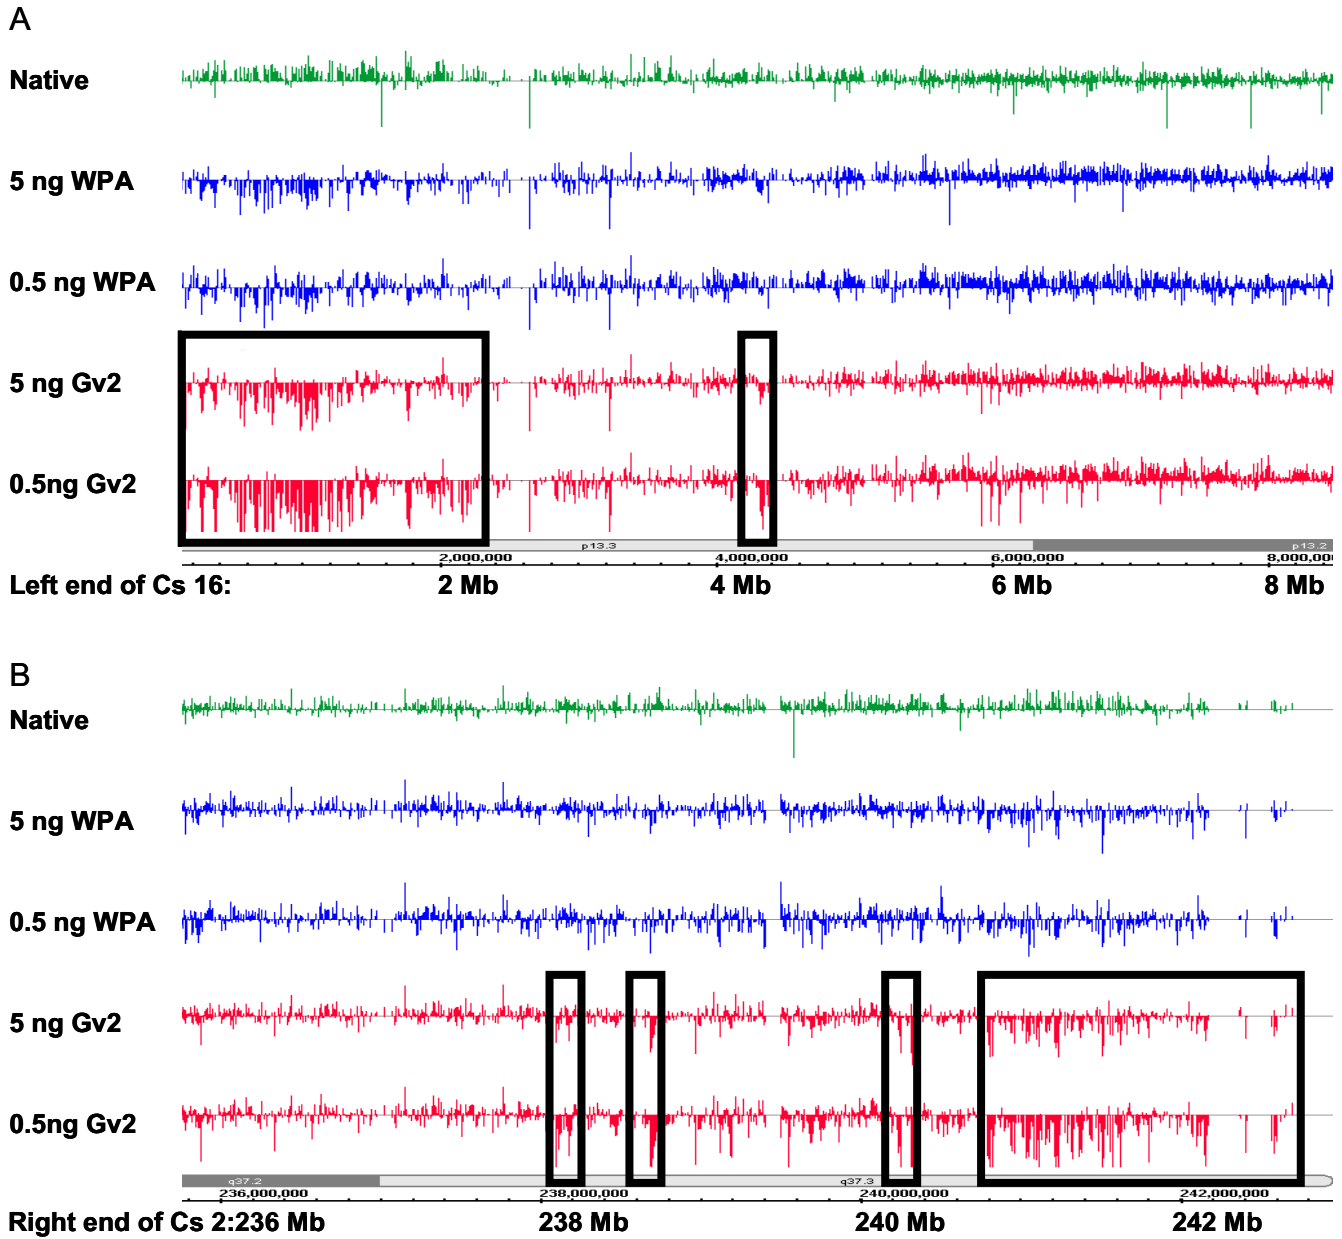

Fig. S5. Examples of a left and a right chromosome terminal region in LRR for amplicons with variants of input, showing that Wpa rescued the sequences that were underrepresented with Gv2 amplification. Generated by using BeadStudio 3.1.3.0 (Illumina), LRR is the log<sub>2</sub> relative ratio of the observed normalized signal intensity of both alleles and the expected intensity based on ≈120 normal samples. The LRR data for each sample were exported and processed to generate an .sgr file for visualization in the IGB browser software, and all samples are shown with the same scale (+3, -3). Rectangular frames refer to some example segments underrepresented. (A) Left terminus of chromosome 16 for sample 05-050. (B) Right terminus of chromosome 2 for sample 05-050. The whole panel of the termini for two samples is shown in Tables S6 and S7.

**Table S1. PicoGreen assayed yield and amplification fold with various amounts of input gDNA in the presence of 0.75 M Tre, as shown in Fig. S2 (duplicate estimates on PicoGreen assay)**

| Input gDNA                     | Concentration, ng/ $\mu$ l |      | Total yield, $\mu$ g/100 $\mu$ l |     | Amplification fold |
|--------------------------------|----------------------------|------|----------------------------------|-----|--------------------|
|                                | Average                    | SD   | Average                          | SD  |                    |
| First round of amplification   |                            |      |                                  |     |                    |
| 87.5 ng                        | 177.9                      | 17.9 | 17.8                             | 1.8 | 203                |
| 12.5 ng                        | 157.6                      | 7.7  | 15.8                             | 0.8 | 1,261              |
| 2.5 ng                         | 142.4                      | 2.7  | 14.2                             | 0.3 | 5,697              |
| 0.5 ng                         | 126.0                      | 8.3  | 12.6                             | 0.8 | 25,202             |
| 0.1 ng                         | 94.5                       | 23.1 | 9.4                              | 2.3 | 94,494             |
| 20 pg                          | 85.7                       | 3.2  | 8.6                              | 0.3 | 428,488            |
| 4 pg                           | 42.1                       | 17.7 | 4.2                              | 1.8 | 1,053,396          |
| 0.8 pg                         | 14.8                       | 2.1  | 1.5                              | 0.2 | 1,850,722          |
| 0 pg                           | ND                         |      | ND                               |     | ND                 |
| Second round of amplification* |                            |      |                                  |     |                    |
| 12.5 ng                        | 944.5                      | 72.0 | 94.5                             | 7.2 | 9,445              |
| 2.5 ng                         | 734.8                      | 25.9 | 73.5                             | 2.6 | 7,348              |
| 0.5 ng                         | 375.7                      | 71.0 | 37.6                             | 7.1 | 3,757              |
| 0.1 ng                         | 406.5                      | 38.7 | 40.6                             | 3.9 | 4,065              |
| 0 ng                           | ND                         |      | ND                               |     | ND                 |

ND, not detectable.

\*With 10 ng of purified amplicons from first round and various inputs of gDNA. However, the second round of amplification for the original 0-ng input was initiated with 1  $\mu$ l (concentration undetectable) of elute from the totally 30  $\mu$ l of elute purified from the 1st round of amplification.



**Table S2. LBS of amplicons with various inputs**

| Wpa amplification procedures   | General procedure |        |        |        |       | Trace DNA procedure |       | Intact cell (three cells)* | Reference |
|--------------------------------|-------------------|--------|--------|--------|-------|---------------------|-------|----------------------------|-----------|
|                                | 12.5 ng           | 2.5 ng | 0.5 ng | 0.1 ng | 20 pg | 0.1 ng              | 20 pg |                            |           |
| Test repeats: Amp × LBS        | 2 × 3             | 2 × 3  | 2 × 3  | 2 × 3  | 2 × 3 | 9 × 1               | 4 × 1 | 19 × 1                     | 9 × 1     |
| Av.LBS (of tests)              | 0.71              | 0.73   | 0.86   | 1.73   | 4.09  | 1.21                | 2.57  | 0.77                       | 0.52      |
| Sd.LBS (among tests)           | 0.17              | 0.01   | 0.07   | 0.45   | 0.92  | 0.23                | 1.00  | 0.17                       | 0.10      |
| Net.LBS (reference subtracted) | 0.49              | 0.52   | 0.69   | 1.66   | 4.06  | 1.09                | 2.51  | 0.57                       | 0.00      |

The general procedure was employed for 12.5-ng to 20-pg inputs. In addition, the trace-input-specific procedure was employed for 0.1-ng and 20-pg inputs, and the intact-cell procedure was used for intact cells, of which all were at 100- $\mu$ l volume reaction without real-time monitor applied.

\*Of the 23 samples of intact cells, the results for 4 samples were discrepant relative to others and, therefore, excluded. In one sample from the cell dilution, there was no amplicon and this presumably represented a well in which there were no cells. The average and standard deviation of LBS (Av.LBS, Sd.LBS) were calculated among the repeats of test of amplification and qPCR. See [SI Text](#) for detail of LBS estimation.

Table S3. qPCR measured locus bias of amplicons from various levels of starting material with native gDNA as reference

| Locus | Wpa Repeat 1 |        |        |             |              | Wpa Repeat 2 |        |        |              |             |
|-------|--------------|--------|--------|-------------|--------------|--------------|--------|--------|--------------|-------------|
|       | 12.5 ng      | 2.5 ng | 0.5 ng | 0.1 ng      | 20 pg        | 12.5 ng      | 2.5 ng | 0.5 ng | 0.1 ng       | 20 pg       |
| 2p    | 0.58         | -0.11  | 0.25   | <i>1.45</i> | <b>7.21</b>  | -0.11        | -0.40  | 0.35   | <i>-1.03</i> | <b>6.19</b> |
| 3p    | -0.69        | -0.66  | -0.39  | 0.34        | <b>0.06</b>  | -0.28        | -0.68  | -1.07  | -1.46        | <b>0.04</b> |
| 4p    | -0.36        | -0.32  | -0.30  | 0.93        | 6.56         | -0.78        | -0.77  | 0.83   | -0.16        | 2.81        |
| 5p    | 1.75         | 1.33   | 1.86   | <b>3.40</b> | <i>-0.21</i> | 0.63         | 1.14   | 1.56   | <b>2.51</b>  | <i>2.00</i> |
| 7p    | -0.56        | -0.42  | -0.70  | <b>1.21</b> | 4.71         | 0.41         | -0.15  | -0.17  | <b>1.04</b>  | 7.00        |
| 10p   | 0.42         | 0.09   | 0.94   | 2.67        | <b>8.99</b>  | -0.17        | -0.08  | 0.51   | 0.98         | <b>2.05</b> |
| 13p   | 0.76         | 0.96   | 1.09   | <i>0.53</i> | <i>9.68</i>  | 0.84         | 0.93   | 1.16   | <i>5.07</i>  | <i>0.09</i> |
| 19p   | 0.42         | 0.24   | 0.14   | 0.46        | 2.32         | 0.14         | 0.13   | 0.75   | 2.23         | 0.79        |
| AvΔCt | 0.29         | 0.14   | 0.36   | 1.37        | 4.91         | 0.08         | 0.01   | 0.49   | 1.15         | 2.62        |
| SdΔCt | 0.81         | 0.69   | 0.87   | 1.11        | 3.85         | 0.53         | 0.70   | 0.82   | 2.13         | 2.65        |

Each amplification was performed twice, and qPCR-LBS assessments of each sample were repeated three times, of which one qPCR result is displayed here. Boldface numbers show apparently consistent bias between two amplification repeats, and boldface, italic numbers show apparently inconsistent bias between two amplification repeats. SdΔCt was denoted as LBS ([SI Text](#)).

**Table S4. Standard deviation of log<sub>2</sub> ratio of signals for sample 05-050 vs. a genomic DNA pool from seven individuals (Cy3 and Cy5 labeled separately) on the tiling array for chromosome 22 long arm**

| Cy3/Cy5                                                                                                                                                                 | Native g/native g (self) | Native 05-050/native G304A | Wpa 05-050/Wpa G304A | Wpa-40° C 05-050/Wpa-40° C G304A |
|-------------------------------------------------------------------------------------------------------------------------------------------------------------------------|--------------------------|----------------------------|----------------------|----------------------------------|
| log <sub>2</sub> ratio for probes excluding the previously known and confirmed, and previous predicted segmental CNVs sequences (23 segments) in earlier investigations |                          |                            |                      |                                  |
| Array ID                                                                                                                                                                | 47750                    | 42762                      | 141539               | 94902                            |
| 2,000-bp window                                                                                                                                                         | 0.079                    | 0.079                      | 0.095                | 0.251                            |
| 800-bp window                                                                                                                                                           | 0.104                    | 0.104                      | 0.119                | 0.293                            |
| 400 bp window                                                                                                                                                           | 0.121                    | 0.123                      | 0.135                | 0.325                            |
| Unaveraged                                                                                                                                                              | 0.161                    | 0.168                      | 0.175                | 0.407                            |
| log <sub>2</sub> ratio with all probes included                                                                                                                         |                          |                            |                      |                                  |
| Array ID                                                                                                                                                                | 47750                    | 42762                      | 141539               | 94902                            |
| 2,000-bp window                                                                                                                                                         | 0.081                    | 0.099                      | 0.117                | 0.256                            |
| 800-bp window                                                                                                                                                           | 0.122                    | 0.135                      | 0.149                | 0.327                            |
| 400-bp window                                                                                                                                                           | 0.105                    | 0.119                      | 0.135                | 0.296                            |
| Unaveraged                                                                                                                                                              | 0.161                    | 0.178                      | 0.185                | 0.408                            |

**Table S5. Analysis of SNP genotyping with the HumanHap550-Duo genotyping BeadChip for amplicons with Wpa vs. Gv2 and native gDNA**

| Sample                                                                              | No. calls | % calls | No. calls both | % discordance | % concordance |
|-------------------------------------------------------------------------------------|-----------|---------|----------------|---------------|---------------|
| Whole-genome SNP analysis                                                           |           |         |                |               |               |
| 05-050                                                                              |           |         |                |               |               |
| Native gDNA                                                                         | 551,904   | 98.30%  | 551,904        | N/A           | N/A           |
| 5-ng input Wpa                                                                      | 551,542   | 98.23%  | 543,751        | 0.15%         | 99.85%        |
| 5-ng input Gv2                                                                      | 556,253   | 99.07%  | 547,943        | 0.10%         | 99.90%        |
| 0.5-ng input Wpa                                                                    | 542,484   | 96.62%  | 534,837        | 0.12%         | 99.88%        |
| 0.5-ng input Gv2                                                                    | 543,454   | 96.79%  | 535,086        | 0.16%         | 99.84%        |
| 04-018*                                                                             |           |         |                |               |               |
| Native gDNA                                                                         | 560,048   | 99.75%  | 560,048        | N/A           | N/A           |
| 5-ng input Wpa                                                                      | 546,303   | 97.30%  | 545,622        | 0.07%         | 99.93%        |
| 5-ng input Gv2                                                                      | 553,899   | 98.65%  | 553,068        | 0.03%         | 99.97%        |
| 0.5-ng input Wpa                                                                    | 516,870   | 92.06%  | 516,176        | 0.31%         | 99.69%        |
| 0.5-ng input Gv2                                                                    | 508,308   | 90.53%  | 507,589        | 0.54%         | 99.46%        |
| Analysis of the SNPs in 5 Mb of the terminal regions for all chromosomes applicable |           |         |                |               |               |
| 05-050                                                                              |           |         |                |               |               |
| Native gDNA                                                                         | 48,524    | 98.53%  | 48,524         | N/A           | N/A           |
| 5-ng input Wpa                                                                      | 48,363    | 98.20%  | 47,755         | 0.14%         | 99.86%        |
| 5-ng input Gv2                                                                      | 48,212    | 97.90%  | 47,591         | 0.13%         | 99.87%        |
| 0.5-ng input Wpa                                                                    | 47,545    | 96.54%  | 46,961         | 0.11%         | 99.89%        |
| 0.5-ng input Gv2                                                                    | 45,827    | 93.06%  | 45,234         | 0.38%         | 99.62%        |
| 04-018*                                                                             |           |         |                |               |               |
| Native gDNA                                                                         | 49,078    | 99.66%  | 49,078         | N/A           | N/A           |
| 5-ng input Wpa                                                                      | 47,700    | 96.86%  | 47,613         | 0.11%         | 99.89%        |
| 5-ng input Gv2                                                                      | 46,766    | 94.96%  | 46,653         | 0.15%         | 99.85%        |
| 0.5-ng input Wpa                                                                    | 44,858    | 91.09%  | 44,770         | 0.43%         | 99.57%        |
| 0.5-ng input Gv2                                                                    | 41,591    | 84.45%  | 41,508         | 1.38%         | 98.62%        |

Calls both, discordance, and concordance are based on a tested sample vs. its native reference. N/A, not applicable.

\*Native or amplified with partially degraded gDNA.

**Table S6. Analysis of LRR of SNP genotyping on 5-Mb left-terminal regions of each of chromosomes with the HumanHap550-Duo genotyping BeadChip for amplicons with Wpa vs. Gv2 and native gDNA**

| Chr.            | SNP no. covered | Native gDNA     | 5-ng input      |                 | 0.5-ng input   |                |
|-----------------|-----------------|-----------------|-----------------|-----------------|----------------|----------------|
|                 |                 |                 | Wpa             | Gv2             | Wpa            | Gv2            |
| Sample 05-050   |                 |                 |                 |                 |                |                |
| 1               | 844             | 0.251           | -0.006          | -0.141          | 0.184          | -0.485         |
| 2               | 1,192           | 0.115           | 0.009           | -0.034          | -0.107         | -0.164         |
| 3               | 1,800           | -0.020          | -0.005          | 0.061           | -0.262         | 0.071          |
| 4               | 729             | 0.189           | -0.025          | -0.133          | 0.024          | -0.405         |
| 5               | 1,240           | 0.144           | -0.012          | -0.065          | -0.067         | -0.217         |
| 6               | 1,518           | 0.063           | 0.029           | 0.029           | -0.024         | -0.037         |
| 7               | 902             | 0.146           | 0.017           | -0.056          | 0.116          | -0.216         |
| 8               | 2,683           | 0.041           | -0.030          | -0.005          | -0.294         | -0.074         |
| 9               | 2,058           | 0.002           | 0.018           | 0.046           | -0.098         | 0.044          |
| 10              | 1,480           | 0.064           | 0.003           | 0.003           | -0.134         | -0.061         |
| 11              | 1,093           | 0.182           | -0.084          | -0.208          | 0.012          | -0.513         |
| 12              | 1,351           | 0.095           | 0.073           | 0.050           | 0.170          | 0.000          |
| 13              | 0               | N/A             | N/A             | N/A             | N/A            | N/A            |
| 14              | 0               | N/A             | N/A             | N/A             | N/A            | N/A            |
| 15              | 0               | N/A             | N/A             | N/A             | N/A            | N/A            |
| 16              | 861             | 0.276           | -0.125          | -0.222          | 0.084          | -0.618         |
| 17              | 1,123           | 0.168           | 0.038           | -0.032          | 0.304          | -0.186         |
| 18              | 1,252           | -0.020          | -0.054          | -0.006          | -0.197         | -0.045         |
| 19              | 872             | 0.322           | -0.080          | -0.292          | 0.342          | -0.836         |
| 20              | 1,516           | 0.113           | 0.093           | 0.056           | 0.182          | -0.011         |
| 21              | 0               | N/A             | N/A             | N/A             | N/A            | N/A            |
| 22              | 0               | N/A             | N/A             | N/A             | N/A            | N/A            |
| Average         | 1,324*          | 0.125           | -0.009          | -0.056          | 0.014          | -0.221         |
| SD              | 501*            | 0.100           | 0.058           | 0.107           | 0.187          | 0.261          |
| Filter cut-off  |                 | Less than -0.15 | Less than -0.15 | Less than -0.15 | Less than -0.3 | Less than -0.3 |
| Filter call no. |                 | 0               | 0               | 3               | 0              | 5              |
| Sample 04-018   |                 |                 |                 |                 |                |                |
| 1               | 844             | 0.155           | -0.051          | -0.656          | -0.095         | -0.838         |
| 2               | 1,192           | 0.067           | -0.144          | -0.206          | -0.224         | -0.291         |
| 3               | 1,800           | -0.015          | -0.186          | 0.092           | -0.312         | 0.078          |
| 4               | 729             | 0.113           | -0.084          | -0.471          | -0.129         | -0.634         |
| 5               | 1,240           | 0.101           | -0.162          | -0.311          | -0.247         | -0.422         |
| 6               | 1,518           | 0.068           | -0.018          | -0.033          | -0.054         | -0.023         |
| 7               | 902             | 0.093           | 0.000           | -0.311          | -0.001         | -0.373         |
| 8               | 2,683           | 0.024           | -0.274          | -0.082          | -0.432         | -0.142         |
| 9               | 2,058           | 0.023           | -0.020          | 0.088           | -0.088         | 0.099          |
| 10              | 1,480           | 0.050           | -0.124          | -0.104          | -0.233         | -0.157         |
| 11              | 1,093           | 0.115           | -0.086          | -0.545          | -0.144         | -0.733         |
| 12              | 1,351           | 0.074           | 0.119           | -0.078          | 0.135          | -0.052         |
| 13              | 0               | N/A             | N/A             | N/A             | N/A            | N/A            |
| 14              | 0               | N/A             | N/A             | N/A             | N/A            | N/A            |
| 15              | 0               | N/A             | N/A             | N/A             | N/A            | N/A            |
| 16              | 861             | 0.194           | -0.119          | -0.760          | -0.154         | -0.896         |
| 17              | 1,123           | 0.104           | 0.208           | -0.277          | 0.277          | -0.297         |
| 18              | 1,252           | 0.001           | -0.119          | 0.040           | -0.208         | 0.015          |
| 19              | 872             | 0.203           | 0.142           | -0.827          | 0.180          | -1.018         |
| 20              | 1,516           | 0.080           | 0.145           | -0.063          | 0.172          | -0.059         |
| 21              | 0               | N/A             | N/A             | N/A             | N/A            | N/A            |
| 22              | 0               | N/A             | N/A             | N/A             | N/A            | N/A            |
| Average         | 1,324*          | 0.085           | -0.045          | -0.265          | -0.078         | -0.338         |
| SD              | 501*            | 0.061           | 0.133           | 0.293           | 0.189          | 0.362          |
| Filter cut-off  |                 | Less than -0.15 | Less than -0.15 | Less than -0.15 | Less than -0.3 | Less than -0.3 |
| Filter call no. |                 | 0               | 3               | 9               | 2              | 7              |

Chromosome terminal regions without SNP are not applied, nor was chromosome X/Y. Mean LRR for each chromosome end are shown. SD, standard deviation. N/A, not applicable. The cut-off was set manually.

**Table S7. Analysis of LRR of SNP genotyping on 5-Mb right-terminal regions of each of chromosomes generated in the same way as in Table S6**

| Chr.            | SNP no. covered | Native gDNA     | 5-ng input      |                 | 0.5-ng input   |                |
|-----------------|-----------------|-----------------|-----------------|-----------------|----------------|----------------|
|                 |                 |                 | Wpa             | Gv2             | Wpa            | Gv2            |
| Sample 05-050   |                 |                 |                 |                 |                |                |
| 1               | 1,106           | 0.063           | 0.021           | 0.016           | -0.033         | -0.041         |
| 2               | 1,105           | 0.183           | -0.059          | -0.162          | -0.033         | -0.427         |
| 3               | 755             | 0.080           | -0.004          | -0.017          | 0.098          | -0.137         |
| 4               | 1,124           | 0.024           | -0.025          | 0.003           | -0.225         | -0.067         |
| 5               | 909             | 0.178           | 0.033           | -0.022          | 0.151          | -0.204         |
| 6               | 1,462           | 0.110           | -0.045          | -0.076          | -0.157         | -0.234         |
| 7               | 1,223           | 0.129           | 0.020           | -0.055          | 0.021          | -0.228         |
| 8               | 932             | 0.247           | -0.038          | -0.205          | 0.086          | -0.532         |
| 9               | 1,061           | 0.297           | -0.080          | -0.292          | 0.125          | -0.735         |
| 10              | 1,314           | 0.180           | -0.010          | -0.066          | -0.039         | -0.242         |
| 11              | 1,583           | 0.110           | 0.153           | 0.130           | 0.182          | 0.125          |
| 12              | 1,531           | 0.158           | 0.109           | 0.020           | 0.179          | -0.107         |
| 13              | 1,128           | 0.137           | -0.016          | -0.073          | -0.049         | -0.247         |
| 14              | 531             | 0.202           | -0.077          | -0.205          | 0.069          | -0.494         |
| 15              | 1,400           | 0.069           | 0.005           | 0.027           | -0.066         | -0.022         |
| 16              | 1,372           | 0.206           | 0.033           | -0.065          | 0.220          | -0.286         |
| 17              | 1,011           | 0.250           | 0.004           | -0.118          | 0.210          | -0.393         |
| 18              | 1,420           | 0.082           | -0.037          | -0.084          | -0.149         | -0.230         |
| 19              | 1,160           | 0.144           | 0.100           | 0.021           | 0.300          | -0.110         |
| 20              | 1,326           | 0.197           | 0.014           | -0.109          | 0.114          | -0.370         |
| 21              | 1,510           | 0.197           | -0.013          | -0.143          | 0.081          | -0.409         |
| 22              | 1,501           | 0.201           | 0.001           | -0.092          | 0.099          | -0.303         |
| Average         | 1,203           | 0.157           | 0.004           | -0.071          | 0.054          | -0.259         |
| SD              | 271             | 0.069           | 0.058           | 0.095           | 0.135          | 0.195          |
| Filter cut-off  |                 | Less than -0.15 | Less than -0.15 | Less than -0.15 | Less than -0.3 | Less than -0.3 |
| Filter call no. |                 | 0               | 0               | 4               | 0              | 8              |
| Sample 04-018   |                 |                 |                 |                 |                |                |
| 1               | 1,106           | 0.044           | -0.024          | -0.004          | -0.058         | -0.008         |
| 2               | 1,105           | 0.107           | -0.130          | -0.501          | -0.198         | -0.637         |
| 3               | 755             | 0.066           | 0.085           | -0.115          | 0.065          | -0.155         |
| 4               | 1,124           | 0.021           | -0.202          | -0.027          | -0.324         | -0.063         |
| 5               | 909             | 0.115           | 0.043           | -0.280          | 0.043          | -0.350         |
| 6               | 1,462           | 0.062           | -0.195          | -0.250          | -0.284         | -0.371         |
| 7               | 1,223           | 0.094           | -0.041          | -0.246          | -0.090         | -0.323         |
| 8               | 932             | 0.167           | -0.090          | -0.661          | -0.141         | -0.852         |
| 9               | 1,061           | 0.183           | -0.073          | -0.828          | -0.130         | -1.056         |
| 10              | 1,314           | 0.084           | -0.173          | -0.410          | -0.251         | -0.503         |
| 11              | 1,583           | 0.057           | 0.114           | 0.014           | 0.120          | 0.023          |
| 12              | 1,531           | 0.093           | 0.100           | -0.170          | 0.065          | -0.234         |
| 13              | 1,128           | 0.086           | -0.116          | -0.298          | -0.214         | -0.412         |
| 14              | 531             | 0.134           | -0.086          | -0.576          | -0.133         | -0.692         |
| 15              | 1,400           | 0.062           | -0.067          | -0.063          | -0.119         | -0.098         |
| 16              | 1,372           | 0.133           | 0.058           | -0.447          | 0.057          | -0.528         |
| 17              | 1,011           | 0.158           | 0.037           | -0.568          | 0.041          | -0.658         |
| 18              | 1,420           | 0.054           | -0.180          | -0.228          | -0.260         | -0.335         |
| 19              | 1,160           | 0.080           | 0.229           | -0.148          | 0.264          | -0.169         |
| 20              | 1,326           | 0.114           | -0.037          | -0.480          | -0.075         | -0.626         |
| 21              | 1,510           | 0.128           | -0.041          | -0.491          | -0.086         | -0.620         |
| 22              | 1,501           | 0.128           | -0.057          | -0.447          | -0.069         | -0.570         |
| Average         | 1,203           | 0.099           | -0.038          | -0.328          | -0.081         | -0.420         |
| SD              | 271             | 0.042           | 0.112           | 0.230           | 0.147          | 0.283          |
| Filter cut-off  |                 | Less than -0.15 | Less than -0.15 | Less than -0.15 | Less than -0.3 | Less than -0.3 |
| Filter call no. |                 | 0               | 4               | 17              | 1              | 15             |
